# Supplementary material for: Myocardial Expression of Pluripotency, Longevity, and Proinflammatory Genes in the Context of Hypercholesterolemia and Statin Treatment
Source: MDPI journal article supplement (doi:10.3390/jcm13071994), 2024-03-29
Supplement: s1 [file s1]

**Supplemental Table S1. Primers**

| Rabbit target gene                | Forward primer          | Reverse primer                   | Target size | NM             |
|-----------------------------------|-------------------------|----------------------------------|-------------|----------------|
| <b><math>\beta</math>-actin</b>   | CCATGTACGTGGCCATCCAG    | TCTTCATGAGGTAGTCGGTCAGGTC        | 148         | NM_001101683   |
| <b>MYD88</b>                      | CCCTTTGTCTCTCGACTCTTG   | TACGAGAACAGCCACTGCCC             | 125         | Trace Archive  |
| <b>NF-<math>\kappa</math>B</b>    | ATGCCAATGCCCTCTTCGACT   | CGTGAAGTCCAGCAGATCCCT            | 122         | Trace Archive  |
| <b>CCL4</b>                       | GAGACCACCAGCCTCTGCTC    | TCAGTTCAGTTCCAAGTCATCCAC         | 123         | NM_001082196   |
| <b>CCL20</b>                      | TATCGTGGGCTTCACACAGC    | CCATTCTTCTTCGGATCTGC             | 115         | Trace Archive  |
| <b>CCR2</b>                       | GGTTGCTGAGAAGCCTGACACGC | CAGGTCTGTATTCTTCAACAAGCCC<br>TCG | 125         | Trace Archive  |
| <b>IFN-<math>\beta</math></b>     | TCCAACATATGGCACGGAAGTCT | TTCTGGAGCTGTTGTGGTTCCT           | 133         | XM_002707968   |
| <b>IFN-<math>\gamma</math></b>    | TGCCAGGACACACTAACCAGAG  | TGCACTCTCCTCTTTCCAATTCC          | 127         | NM_001081991   |
| <b>IL-1<math>\beta</math></b>     | TTGAAGAAGAACCCGTCCTCTG  | CTCATACGTGCCAGACAACACC           | 128         | NM_001082201   |
| <b>IL-2</b>                       | GCCCAAGAAGGTCACAGAATTG  | TGCTGATTGATTCTCTGGTATTTCC        | 128         | NM_001163180   |
| <b>IL-4</b>                       | CGACATCATCCTACCCGAAGTC  | CCTCTCTCTCGGTTGTGTTCTTG          | 122         | NM_001163177   |
| <b>IL-8</b>                       | CCACACCTTTCCATCCCAAAT   | CTTCTGCACCCACTTTTCCTTG           | 122         | NM_001082293   |
| <b>IL-10</b>                      | CTTTGGCAGGGTGAAGACTTTC  | ACTGGATCATCTCCGACAAGG            | 126         | NM_001082045   |
| <b>IL-18</b>                      | ACCAAGGACAGCAACCTGTGTT  | ACAGAGAGGCTTACAGCCATGC           | 120         | NM_001122940   |
| <b><math>\alpha</math>-Klotho</b> | CAGCGACGGCTACAACAATG    | AGCAGAGTTTCGGCGTAATCC            | 296         | Trace Archive  |
| <b>KLF4</b>                       | ACGTACTCGCCTTGCTGATG    | CAAAAACCCCGAATTGCCCCG            | 151         | XM_017347259.1 |
| <b>HOXA5</b>                      | CATGCTCTTTGCCTCTCCGA    | TTAGGGCAACGAGAACAGGG             | 248         | Trace Archive  |
| <b>NANOG</b>                      | TACCCAGGCTTCTACCTGTC    | GGTTACTCCACGACTGGCTG             | 136         | XM_002712762.1 |
| <b>HIF1<math>\alpha</math></b>    | TTTTGGCAGCAACGACACAG    | GTGCAGGGTCAGCACTACTT             | 173         | Trace Archive  |

*Myeloid differentiation primary response 88 (MYD88); Nuclear factor kappa-light-chain-enhancer of activated B cells (NF- $\kappa$ B); C-C chemokine ligand (CCL4); Chemokine (C-C motif) ligand 20 (CCL20); C-C chemokine receptor type 2 (CCR2); Interferon beta (IFN- $\beta$ ); Interferon gamma (IFN- $\gamma$ ); interleukin 1 $\beta$  (IL-1 $\beta$ ); interleukin 2 (IL-2); interleukin 4 (IL-4); interleukin 8 (IL-8); interleukin 10 (IL-10); interleukin 18 (IL-18); krüppel-like factor 4 (KLF4); hypoxia-inducible factor 1-alpha (HIF1 $\alpha$ )*
