# Supplementary material for: Myocardial Expression of Pluripotency, Longevity, and Proinflammatory Genes in the Context of Hypercholesterolemia and Statin Treatment
Source: MDPI journal article supplement (doi:10.3390/jcm13071994), 2024-03-29
Supplement: s1 [file s1]

Parameter  
Table Analyzed MYD88

#### One-way analysis of variance

P value P<0.0001  
P value summary \*\*\*  
Are means signif. different? (P < 0.05) Yes  
Number of groups 8  
F 117,5  
R squared 0,9536

#### Bartlett's test for equal variances

Bartlett's statistic (corrected) 41,80  
P value P<0.0001  
P value summary \*\*\*  
Do the variances differ signif. (P < 0.05) Yes

| ANOVA Table                 | SS    | df | MS        |
|-----------------------------|-------|----|-----------|
| Treatment (between columns) | 519,5 |    | 7 74,22   |
| Residual (within columns)   | 25,27 |    | 40 0,6317 |
| Total                       | 544,8 |    | 47        |

| Tukey's Multiple Comparison Test | Mean Diff. | q        | Significant | Summary | 95% CI of diff    |
|----------------------------------|------------|----------|-------------|---------|-------------------|
| C90 vs G30                       | -4,272     | 13,16    | Yes         | ***     | -5.738 to -2.805  |
| C90 vs G60                       | -5,268     | 16,24    | Yes         | ***     | -6.735 to -3.801  |
| C90 vs G90                       | -7,160     | 22,07    | Yes         | ***     | -8.627 to -5.693  |
| C90 vs C120                      | 0,001167   | 0,003596 | No          | ns      | -1.466 to 1.468   |
| C90 vs G120                      | -9,783     | 30,15    | Yes         | ***     | -11.25 to -8.316  |
| C90 vs GF120                     | -7,810     | 24,07    | Yes         | ***     | -9.277 to -6.343  |
| C90 vs GR 120                    | -4,067     | 12,53    | Yes         | ***     | -5.533 to -2.600  |
| G30 vs G60                       | -0,9967    | 3,072    | No          | ns      | -2.464 to 0.4702  |
| G30 vs G90                       | -2,888     | 8,902    | Yes         | ***     | -4.355 to -1.421  |
| G30 vs C120                      | 4,273      | 13,17    | Yes         | ***     | 2.806 to 5.740    |
| G30 vs G120                      | -5,512     | 16,99    | Yes         | ***     | -6.979 to -4.045  |
| G30 vs GF120                     | -3,538     | 10,91    | Yes         | ***     | -5.005 to -2.071  |
| G30 vs GR 120                    | 0,2050     | 0,6318   | No          | ns      | -1.262 to 1.672   |
| G60 vs G90                       | -1,892     | 5,830    | Yes         | **      | -3.359 to -0.4248 |
| G60 vs C120                      | 5,269      | 16,24    | Yes         | ***     | 3.802 to 6.736    |
| G60 vs G120                      | -4,515     | 13,92    | Yes         | ***     | -5.982 to -3.048  |
| G60 vs GF120                     | -2,542     | 7,833    | Yes         | ***     | -4.009 to -1.075  |
| G60 vs GR 120                    | 1,202      | 3,704    | No          | ns      | -0.2652 to 2.669  |
| G90 vs C120                      | 7,161      | 22,07    | Yes         | ***     | 5.694 to 8.628    |
| G90 vs G120                      | -2,623     | 8,085    | Yes         | ***     | -4.090 to -1.156  |
| G90 vs GF120                     | -0,6500    | 2,003    | No          | ns      | -2.117 to 0.8169  |
| G90 vs GR 120                    | 3,093      | 9,534    | Yes         | ***     | 1.626 to 4.560    |
| C120 vs G120                     | -9,784     | 30,16    | Yes         | ***     | -11.25 to -8.317  |
| C120 vs GF120                    | -7,811     | 24,07    | Yes         | ***     | -9.278 to -6.344  |
| C120 vs GR 120                   | -4,068     | 12,54    | Yes         | ***     | -5.535 to -2.601  |
| G120 vs GF120                    | 1,973      | 6,082    | Yes         | **      | 0.5064 to 3.440   |
| G120 vs GR 120                   | 5,717      | 17,62    | Yes         | ***     | 4.250 to 7.184    |

|                 |       |       |     |     |                |
|-----------------|-------|-------|-----|-----|----------------|
| GF120 vs GR 120 | 3,743 | 11,54 | Yes | *** | 2.276 to 5.210 |
|-----------------|-------|-------|-----|-----|----------------|

Parameter  
Table Analyzed NFKB

One-way analysis of variance

P value P<0.0001  
P value summary \*\*\*  
Are means signif. different? (P < 0.05) Yes  
Number of groups 8  
F 238,4  
R squared 0,9766

Bartlett's test for equal variances

Bartlett's statistic (corrected) 54,62  
P value P<0.0001  
P value summary \*\*\*  
Do the variances differ signif. (P < 0.0) Yes

| ANOVA Table                 | SS    | df | MS    |
|-----------------------------|-------|----|-------|
| Treatment (between columns) | 1919  | 7  | 274,1 |
| Residual (within columns)   | 45,99 | 40 | 1,150 |
| Total                       | 1965  | 47 |       |

| Tukey's Multiple Comparison Test | Mean Diff. | q        | Significant | Summary | 95% CI of diff    |
|----------------------------------|------------|----------|-------------|---------|-------------------|
| C90 vs G30                       | -6,131     | 14,00    | Yes         | ***     | -8.110 to -4.151  |
| C90 vs G60                       | -8,897     | 20,32    | Yes         | ***     | -10.88 to -6.918  |
| C90 vs G90                       | -12,66     | 28,92    | Yes         | ***     | -14.64 to -10.68  |
| C90 vs C120                      | -0,002333  | 0,005330 | No          | ns      | -1.982 to 1.977   |
| C90 vs G120                      | -20,44     | 46,68    | Yes         | ***     | -22.41 to -18.46  |
| C90 vs GF120                     | -9,134     | 20,86    | Yes         | ***     | -11.11 to -7.155  |
| C90 vs GR 120                    | -4,784     | 10,93    | Yes         | ***     | -6.763 to -2.805  |
| G30 vs G60                       | -2,767     | 6,320    | Yes         | **      | -4.746 to -0.7875 |
| G30 vs G90                       | -6,530     | 14,92    | Yes         | ***     | -8.509 to -4.551  |
| G30 vs C120                      | 6,128      | 14,00    | Yes         | ***     | 4.149 to 8.107    |
| G30 vs G120                      | -14,31     | 32,68    | Yes         | ***     | -16.28 to -12.33  |
| G30 vs GF120                     | -3,003     | 6,860    | Yes         | ***     | -4.983 to -1.024  |
| G30 vs GR 120                    | 1,347      | 3,076    | No          | ns      | -0.6325 to 3.326  |
| G60 vs G90                       | -3,763     | 8,597    | Yes         | ***     | -5.743 to -1.784  |
| G60 vs C120                      | 8,895      | 20,32    | Yes         | ***     | 6.916 to 10.87    |
| G60 vs G120                      | -11,54     | 26,36    | Yes         | ***     | -13.52 to -9.559  |
| G60 vs GF120                     | -0,2367    | 0,5406   | No          | ns      | -2.216 to 1.743   |
| G60 vs GR 120                    | 4,113      | 9,396    | Yes         | ***     | 2.134 to 6.093    |
| G90 vs C120                      | 12,66      | 28,91    | Yes         | ***     | 10.68 to 14.64    |
| G90 vs G120                      | -7,775     | 17,76    | Yes         | ***     | -9.754 to -5.796  |
| G90 vs GF120                     | 3,527      | 8,056    | Yes         | ***     | 1.547 to 5.506    |
| G90 vs GR 120                    | 7,877      | 17,99    | Yes         | ***     | 5.897 to 9.856    |
| C120 vs G120                     | -20,43     | 46,68    | Yes         | ***     | -22.41 to -18.45  |
| C120 vs GF120                    | -9,131     | 20,86    | Yes         | ***     | -11.11 to -7.152  |
| C120 vs GR 120                   | -4,782     | 10,92    | Yes         | ***     | -6.761 to -2.802  |
| G120 vs GF120                    | 11,30      | 25,82    | Yes         | ***     | 9.322 to 13.28    |
| G120 vs GR 120                   | 15,65      | 35,75    | Yes         | ***     | 13.67 to 17.63    |

|                 |       |       |     |     |                |
|-----------------|-------|-------|-----|-----|----------------|
| GF120 vs GR 120 | 4,350 | 9,937 | Yes | *** | 2.371 to 6.329 |
|-----------------|-------|-------|-----|-----|----------------|

Parameter  
Table Analyzed CCL4

#### One-way analysis of variance

P value P<0.0001  
P value summary \*\*\*  
Are means signif. different? Yes  
Number of groups 8  
F 147,9  
R squared 0,9628

#### Bartlett's test for equal variances

Bartlett's statistic (corrected) 52,36  
P value P<0.0001  
P value summary \*\*\*  
Do the variances differ sign Yes

| ANOVA Table               | SS    | df | MS    |
|---------------------------|-------|----|-------|
| Treatment (between column | 1420  | 7  | 202,8 |
| Residual (within columns) | 54,88 | 40 | 1,372 |
| Total                     | 1475  | 47 |       |

| Tukey's Multiple Compariso | Mean Diff. | q       | Significant | Summary | 95% CI of diff     |
|----------------------------|------------|---------|-------------|---------|--------------------|
| C90 vs G30                 | -4,838     | 10,12   | Yes         | ***     | -7.000 to -2.677   |
| C90 vs G60                 | -9,433     | 19,73   | Yes         | ***     | -11.60 to -7.272   |
| C90 vs G90                 | -13,69     | 28,63   | Yes         | ***     | -15.85 to -11.53   |
| C90 vs C120                | 0,01083    | 0,02266 | No          | ns      | -2.151 to 2.173    |
| C90 vs G120                | -15,85     | 33,14   | Yes         | ***     | -18.01 to -13.68   |
| C90 vs GF120               | -9,677     | 20,24   | Yes         | ***     | -11.84 to -7.515   |
| C90 vs GR 120              | -6,825     | 14,27   | Yes         | ***     | -8.987 to -4.663   |
| G30 vs G60                 | -4,595     | 9,610   | Yes         | ***     | -6.757 to -2.433   |
| G30 vs G90                 | -8,852     | 18,51   | Yes         | ***     | -11.01 to -6.690   |
| G30 vs C120                | 4,849      | 10,14   | Yes         | ***     | 2.687 to 7.011     |
| G30 vs G120                | -11,01     | 23,02   | Yes         | ***     | -13.17 to -8.847   |
| G30 vs GF120               | -4,838     | 10,12   | Yes         | ***     | -7.000 to -2.677   |
| G30 vs GR 120              | -1,987     | 4,155   | No          | ns      | -4.148 to 0.1752   |
| G60 vs G90                 | -4,257     | 8,902   | Yes         | ***     | -6.418 to -2.095   |
| G60 vs C120                | 9,444      | 19,75   | Yes         | ***     | 7.282 to 11.61     |
| G60 vs G120                | -6,413     | 13,41   | Yes         | ***     | -8.575 to -4.252   |
| G60 vs GF120               | -0,2433    | 0,5089  | No          | ns      | -2.405 to 1.918    |
| G60 vs GR 120              | 2,608      | 5,455   | Yes         | **      | 0.4465 to 4.770    |
| G90 vs C120                | 13,70      | 28,65   | Yes         | ***     | 11.54 to 15.86     |
| G90 vs G120                | -2,157     | 4,510   | No          | ns      | -4.318 to 0.005151 |
| G90 vs GF120               | 4,013      | 8,393   | Yes         | ***     | 1.852 to 6.175     |
| G90 vs GR 120              | 6,865      | 14,36   | Yes         | ***     | 4.703 to 9.027     |
| C120 vs G120               | -15,86     | 33,16   | Yes         | ***     | -18.02 to -13.70   |
| C120 vs GF120              | -9,688     | 20,26   | Yes         | ***     | -11.85 to -7.526   |
| C120 vs GR 120             | -6,836     | 14,30   | Yes         | ***     | -8.998 to -4.674   |
| G120 vs GF120              | 6,170      | 12,90   | Yes         | ***     | 4.008 to 8.332     |
| G120 vs GR 120             | 9,022      | 18,87   | Yes         | ***     | 6.860 to 11.18     |

|                 |       |       |     |    |                 |
|-----------------|-------|-------|-----|----|-----------------|
| GF120 vs GR 120 | 2,852 | 5,964 | Yes | ** | 0.6898 to 5.013 |
|-----------------|-------|-------|-----|----|-----------------|

Parameter  
Table Analyzed CCL20

#### One-way analysis of variance

P value P<0.0001  
P value summary \*\*\*  
Are means signif. different? Yes  
Number of groups 8  
F 114,6  
R squared 0,9525

#### Bartlett's test for equal variances

Bartlett's statistic (corrected 69,85  
P value P<0.0001  
P value summary \*\*\*  
Do the variances differ sign Yes

| ANOVA Table               | SS    | df | MS       |
|---------------------------|-------|----|----------|
| Treatment (between column | 5526  |    | 7 789,4  |
| Residual (within columns) | 275,4 |    | 40 6,886 |
| Total                     | 5801  |    | 47       |

| Tukey's Multiple Compariso | Mean Diff. | q       | Significant | Summary | 95% CI of diff   |
|----------------------------|------------|---------|-------------|---------|------------------|
| C90 vs G30                 | -13,40     | 12,51   | Yes         | ***     | -18.25 to -8.559 |
| C90 vs G60                 | -14,20     | 13,26   | Yes         | ***     | -19.05 to -9.361 |
| C90 vs G90                 | -20,96     | 19,56   | Yes         | ***     | -25.80 to -16.12 |
| C90 vs C120                | 0,0290     | 0,02707 | No          | ns      | -4.814 to 4.872  |
| C90 vs G120                | -33,50     | 31,27   | Yes         | ***     | -38.34 to -28.65 |
| C90 vs GF120               | -24,04     | 22,44   | Yes         | ***     | -28.88 to -19.20 |
| C90 vs GR 120              | -18,13     | 16,92   | Yes         | ***     | -22.97 to -13.28 |
| G30 vs G60                 | -0,8017    | 0,7483  | No          | ns      | -5.645 to 4.042  |
| G30 vs G90                 | -7,557     | 7,054   | Yes         | ***     | -12.40 to -2.713 |
| G30 vs C120                | 13,43      | 12,54   | Yes         | ***     | 8.588 to 18.27   |
| G30 vs G120                | -20,10     | 18,76   | Yes         | ***     | -24.94 to -15.25 |
| G30 vs GF120               | -10,64     | 9,929   | Yes         | ***     | -15.48 to -5.793 |
| G30 vs GR 120              | -4,725     | 4,411   | No          | ns      | -9.568 to 0.1183 |
| G60 vs G90                 | -6,755     | 6,305   | Yes         | **      | -11.60 to -1.912 |
| G60 vs C120                | 14,23      | 13,29   | Yes         | ***     | 9.390 to 19.08   |
| G60 vs G120                | -19,29     | 18,01   | Yes         | ***     | -24.14 to -14.45 |
| G60 vs GF120               | -9,835     | 9,180   | Yes         | ***     | -14.68 to -4.992 |
| G60 vs GR 120              | -3,923     | 3,662   | No          | ns      | -8.767 to 0.9200 |
| G90 vs C120                | 20,99      | 19,59   | Yes         | ***     | 16.14 to 25.83   |
| G90 vs G120                | -12,54     | 11,70   | Yes         | ***     | -17.38 to -7.695 |
| G90 vs GF120               | -3,080     | 2,875   | No          | ns      | -7.923 to 1.763  |
| G90 vs GR 120              | 2,832      | 2,643   | No          | ns      | -2.012 to 7.675  |
| C120 vs G120               | -33,53     | 31,30   | Yes         | ***     | -38.37 to -28.68 |
| C120 vs GF120              | -24,07     | 22,47   | Yes         | ***     | -28.91 to -19.22 |
| C120 vs GR 120             | -18,16     | 16,95   | Yes         | ***     | -23.00 to -13.31 |
| G120 vs GF120              | 9,458      | 8,829   | Yes         | ***     | 4.615 to 14.30   |
| G120 vs GR 120             | 15,37      | 14,35   | Yes         | ***     | 10.53 to 20.21   |

|                 |       |       |     |    |                |
|-----------------|-------|-------|-----|----|----------------|
| GF120 vs GR 120 | 5,912 | 5,518 | Yes | ** | 1.068 to 10.75 |
|-----------------|-------|-------|-----|----|----------------|



Parameter  
Table Analyzed CCR2

#### One-way analysis of variance

P value P<0.0001  
P value summary \*\*\*  
Are means signif. different? Yes  
Number of groups 8  
F 226,9  
R squared 0,9754

#### Bartlett's test for equal variances

Bartlett's statistic (corrected 66,38  
P value P<0.0001  
P value summary \*\*\*  
Do the variances differ signi Yes

| ANOVA Table               | SS    | df | MS       |
|---------------------------|-------|----|----------|
| Treatment (between column | 6232  |    | 7 890,4  |
| Residual (within columns) | 157,0 |    | 40 3,925 |
| Total                     | 6389  |    | 47       |

| Tukey's Multiple Compariso | Mean Diff. | q       | Significant | Summary | 95% CI of diff    |
|----------------------------|------------|---------|-------------|---------|-------------------|
| C90 vs G30                 | -13,99     | 17,30   | Yes         | ***     | -17.65 to -10.33  |
| C90 vs G60                 | -18,06     | 22,33   | Yes         | ***     | -21.72 to -14.41  |
| C90 vs G90                 | -25,50     | 31,52   | Yes         | ***     | -29.15 to -21.84  |
| C90 vs C120                | -0,0350    | 0,04328 | No          | ns      | -3.691 to 3.621   |
| C90 vs G120                | -31,48     | 38,92   | Yes         | ***     | -35.13 to -27.82  |
| C90 vs GF120               | -29,39     | 36,34   | Yes         | ***     | -33.05 to -25.74  |
| C90 vs GR 120              | -21,26     | 26,28   | Yes         | ***     | -24.91 to -17.60  |
| G30 vs G60                 | -4,073     | 5,037   | Yes         | *       | -7.730 to -0.4170 |
| G30 vs G90                 | -11,51     | 14,23   | Yes         | ***     | -15.16 to -7.850  |
| G30 vs C120                | 13,95      | 17,25   | Yes         | ***     | 10.30 to 17.61    |
| G30 vs G120                | -17,49     | 21,62   | Yes         | ***     | -21.14 to -13.83  |
| G30 vs GF120               | -15,40     | 19,05   | Yes         | ***     | -19.06 to -11.75  |
| G30 vs GR 120              | -7,267     | 8,985   | Yes         | ***     | -10.92 to -3.610  |
| G60 vs G90                 | -7,433     | 9,191   | Yes         | ***     | -11.09 to -3.777  |
| G60 vs C120                | 18,03      | 22,29   | Yes         | ***     | 14.37 to 21.68    |
| G60 vs G120                | -13,42     | 16,59   | Yes         | ***     | -17.07 to -9.759  |
| G60 vs GF120               | -11,33     | 14,01   | Yes         | ***     | -14.99 to -7.674  |
| G60 vs GR 120              | -3,193     | 3,948   | No          | ns      | -6.850 to 0.4630  |
| G90 vs C120                | 25,46      | 31,48   | Yes         | ***     | 21.80 to 29.12    |
| G90 vs G120                | -5,982     | 7,396   | Yes         | ***     | -9.638 to -2.325  |
| G90 vs GF120               | -3,897     | 4,818   | Yes         | *       | -7.553 to -0.2403 |
| G90 vs GR 120              | 4,240      | 5,243   | Yes         | *       | 0.5836 to 7.896   |
| C120 vs G120               | -31,44     | 38,88   | Yes         | ***     | -35.10 to -27.79  |
| C120 vs GF120              | -29,36     | 36,30   | Yes         | ***     | -33.01 to -25.70  |
| C120 vs GR 120             | -21,22     | 26,24   | Yes         | ***     | -24.88 to -17.56  |
| G120 vs GF120              | 2,085      | 2,578   | No          | ns      | -1.571 to 5.741   |
| G120 vs GR 120             | 10,22      | 12,64   | Yes         | ***     | 6.565 to 13.88    |

|                 |       |       |     |     |                |
|-----------------|-------|-------|-----|-----|----------------|
| GF120 vs GR 120 | 8,137 | 10,06 | Yes | *** | 4.480 to 11.79 |
|-----------------|-------|-------|-----|-----|----------------|

Parameter  
Table Analyzed IFNb

One-way analysis of variance

P value P<0.0001

P value summary \*\*\*

Are means signif. differe Yes

Number of groups 8

F 119,9

R squared 0,9545

Bartlett's test for equal variances

Bartlett's statistic (correc 58,93

P value P<0.0001

P value summary \*\*\*

Do the variances differ s Yes

| ANOVA Table             | SS    | df | MS    |
|-------------------------|-------|----|-------|
| Treatment (between col  | 1476  | 7  | 210,8 |
| Residual (within column | 70,35 | 40 | 1,759 |
| Total                   | 1546  | 47 |       |

| Tukey's Multiple Compa | Mean Diff. | q       | Significant | Summary | 95% CI of diff    |
|------------------------|------------|---------|-------------|---------|-------------------|
| C90 vs G30             | -5,489     | 10,14   | Yes         | ***     | -7.936 to -3.041  |
| C90 vs G60             | -6,604     | 12,20   | Yes         | ***     | -9.051 to -4.156  |
| C90 vs G90             | -6,995     | 12,92   | Yes         | ***     | -9.443 to -4.548  |
| C90 vs C120            | -0,0275    | 0,05079 | No          | ns      | -2.475 to 2.420   |
| C90 vs G120            | -8,525     | 15,75   | Yes         | ***     | -10.97 to -6.078  |
| C90 vs GF120           | -14,40     | 26,59   | Yes         | ***     | -16.84 to -11.95  |
| C90 vs GR 120          | -16,47     | 30,42   | Yes         | ***     | -18.92 to -14.02  |
| G30 vs G60             | -1,115     | 2,059   | No          | ns      | -3.563 to 1.333   |
| G30 vs G90             | -1,507     | 2,783   | No          | ns      | -3.954 to 0.9410  |
| G30 vs C120            | 5,461      | 10,09   | Yes         | ***     | 3.014 to 7.909    |
| G30 vs G120            | -3,037     | 5,609   | Yes         | **      | -5.484 to -0.5890 |
| G30 vs GF120           | -8,908     | 16,45   | Yes         | ***     | -11.36 to -6.461  |
| G30 vs GR 120          | -10,98     | 20,28   | Yes         | ***     | -13.43 to -8.532  |
| G60 vs G90             | -0,3917    | 0,7234  | No          | ns      | -2.839 to 2.056   |
| G60 vs C120            | 6,576      | 12,15   | Yes         | ***     | 4.129 to 9.024    |
| G60 vs G120            | -1,922     | 3,549   | No          | ns      | -4.369 to 0.5260  |
| G60 vs GF120           | -7,793     | 14,39   | Yes         | ***     | -10.24 to -5.346  |
| G60 vs GR 120          | -9,865     | 18,22   | Yes         | ***     | -12.31 to -7.417  |
| G90 vs C120            | 6,968      | 12,87   | Yes         | ***     | 4.520 to 9.415    |
| G90 vs G120            | -1,530     | 2,826   | No          | ns      | -3.978 to 0.9176  |
| G90 vs GF120           | -7,402     | 13,67   | Yes         | ***     | -9.849 to -4.954  |
| G90 vs GR 120          | -9,473     | 17,50   | Yes         | ***     | -11.92 to -7.026  |
| C120 vs G120           | -8,498     | 15,70   | Yes         | ***     | -10.95 to -6.050  |
| C120 vs GF120          | -14,37     | 26,54   | Yes         | ***     | -16.82 to -11.92  |
| C120 vs GR 120         | -16,44     | 30,37   | Yes         | ***     | -18.89 to -13.99  |
| G120 vs GF120          | -5,872     | 10,85   | Yes         | ***     | -8.319 to -3.424  |
| G120 vs GR 120         | -7,943     | 14,67   | Yes         | ***     | -10.39 to -5.496  |

|                 |        |       |    |    |                  |
|-----------------|--------|-------|----|----|------------------|
| GF120 vs GR 120 | -2,072 | 3,827 | No | ns | -4.519 to 0.3760 |
|-----------------|--------|-------|----|----|------------------|

# Parameter

Table Analyzed

IFNa

## One-way analysis of variance

P value P<0.0001

P value summary \*\*\*

Are means signif. different? (P <Yes

Number of groups 8

F 308,4

R squared 0,9818

## Bartlett's test for equal variances

Bartlett's statistic (corrected) 59,93

P value P<0.0001

P value summary \*\*\*

Do the variances differ signif. (P Yes

| ANOVA Table                 | SS    | df | MS      |
|-----------------------------|-------|----|---------|
| Treatment (between columns) | 2927  |    | 7 418,1 |
| Residual (within columns)   | 54,23 | 40 | 1,356   |
| Total                       | 2981  | 47 |         |

| Tukey's Multiple Comparison Te | Mean Diff. | q      | Significant | Summary | 95% CI of diff     |
|--------------------------------|------------|--------|-------------|---------|--------------------|
| C90 vs G30                     | -14,91     | 31,38  | Yes         | ***     | -17.06 to -12.77   |
| C90 vs G60                     | -15,47     | 32,55  | Yes         | ***     | -17.62 to -13.32   |
| C90 vs G90                     | -16,78     | 35,30  | Yes         | ***     | -18.93 to -14.63   |
| C90 vs C120                    | -0,05600   | 0,1178 | No          | ns      | -2.205 to 2.093    |
| C90 vs G120                    | -17,72     | 37,27  | Yes         | ***     | -19.87 to -15.57   |
| C90 vs GF120                   | -17,55     | 36,93  | Yes         | ***     | -19.70 to -15.40   |
| C90 vs GR 120                  | -22,18     | 46,66  | Yes         | ***     | -24.33 to -20.03   |
| G30 vs G60                     | -0,5583    | 1,175  | No          | ns      | -2.707 to 1.591    |
| G30 vs G90                     | -1,863     | 3,920  | No          | ns      | -4.012 to 0.2857   |
| G30 vs C120                    | 14,86      | 31,26  | Yes         | ***     | 12.71 to 17.01     |
| G30 vs G120                    | -2,803     | 5,897  | Yes         | **      | -4.952 to -0.6543  |
| G30 vs GF120                   | -2,638     | 5,550  | Yes         | **      | -4.787 to -0.4893  |
| G30 vs GR 120                  | -7,267     | 15,29  | Yes         | ***     | -9.416 to -5.118   |
| G60 vs G90                     | -1,305     | 2,745  | No          | ns      | -3.454 to 0.8441   |
| G60 vs C120                    | 15,42      | 32,43  | Yes         | ***     | 13.27 to 17.57     |
| G60 vs G120                    | -2,245     | 4,723  | Yes         | *       | -4.394 to -0.09592 |
| G60 vs GF120                   | -2,080     | 4,376  | No          | ns      | -4.229 to 0.06907  |
| G60 vs GR 120                  | -6,708     | 14,11  | Yes         | ***     | -8.857 to -4.559   |
| G90 vs C120                    | 16,72      | 35,18  | Yes         | ***     | 14.57 to 18.87     |
| G90 vs G120                    | -0,9400    | 1,977  | No          | ns      | -3.089 to 1.209    |
| G90 vs GF120                   | -0,7750    | 1,630  | No          | ns      | -2.924 to 1.374    |
| G90 vs GR 120                  | -5,403     | 11,37  | Yes         | ***     | -7.552 to -3.254   |
| C120 vs G120                   | -17,66     | 37,16  | Yes         | ***     | -19.81 to -15.51   |
| C120 vs GF120                  | -17,50     | 36,81  | Yes         | ***     | -19.65 to -15.35   |
| C120 vs GR 120                 | -22,13     | 46,54  | Yes         | ***     | -24.27 to -19.98   |
| G120 vs GF120                  | 0,1650     | 0,3471 | No          | ns      | -1.984 to 2.314    |
| G120 vs GR 120                 | -4,463     | 9,389  | Yes         | ***     | -6.612 to -2.314   |

|                 |        |       |     |     |                  |
|-----------------|--------|-------|-----|-----|------------------|
| GF120 vs GR 120 | -4,628 | 9,737 | Yes | *** | -6.777 to -2.479 |
|-----------------|--------|-------|-----|-----|------------------|

Parameter  
Table Analyzed IL1b

#### One-way analysis of variance

P value P<0.0001  
P value summary \*\*\*  
Are means signif. different? (P < Yes  
Number of groups 8  
F 401,2  
R squared 0,9860

#### Bartlett's test for equal variances

Bartlett's statistic (corrected) 53,00  
P value P<0.0001  
P value summary \*\*\*  
Do the variances differ signif. (P Yes

| ANOVA Table                 | SS    | df | MS    |
|-----------------------------|-------|----|-------|
| Treatment (between columns) | 11160 | 7  | 1595  |
| Residual (within columns)   | 159,0 | 40 | 3,975 |
| Total                       | 11320 | 47 |       |

| Tukey's Multiple Comparison Te | Mean Diff. | q      | Significant | Summary | 95% CI of diff    |
|--------------------------------|------------|--------|-------------|---------|-------------------|
| C90 vs G30                     | -28,72     | 35,29  | Yes         | ***     | -32.40 to -25.04  |
| C90 vs G60                     | -31,03     | 38,13  | Yes         | ***     | -34.71 to -27.35  |
| C90 vs G90                     | -35,17     | 43,21  | Yes         | ***     | -38.85 to -31.49  |
| C90 vs C120                    | 0,4950     | 0,6082 | No          | ns      | -3.185 to 4.175   |
| C90 vs G120                    | -43,67     | 53,65  | Yes         | ***     | -47.34 to -39.99  |
| C90 vs GF120                   | -33,15     | 40,72  | Yes         | ***     | -36.83 to -29.47  |
| C90 vs GR 120                  | -29,14     | 35,80  | Yes         | ***     | -32.82 to -25.46  |
| G30 vs G60                     | -2,310     | 2,838  | No          | ns      | -5.990 to 1.370   |
| G30 vs G90                     | -6,450     | 7,924  | Yes         | ***     | -10.13 to -2.770  |
| G30 vs C120                    | 29,22      | 35,90  | Yes         | ***     | 25.54 to 32.90    |
| G30 vs G120                    | -14,94     | 18,36  | Yes         | ***     | -18.62 to -11.26  |
| G30 vs GF120                   | -4,423     | 5,434  | Yes         | **      | -8.103 to -0.7435 |
| G30 vs GR 120                  | -0,4133    | 0,5078 | No          | ns      | -4.093 to 3.266   |
| G60 vs G90                     | -4,140     | 5,086  | Yes         | *       | -7.820 to -0.4602 |
| G60 vs C120                    | 31,53      | 38,74  | Yes         | ***     | 27.85 to 35.21    |
| G60 vs G120                    | -12,63     | 15,52  | Yes         | ***     | -16.31 to -8.952  |
| G60 vs GF120                   | -2,113     | 2,596  | No          | ns      | -5.793 to 1.566   |
| G60 vs GR 120                  | 1,897      | 2,330  | No          | ns      | -1.783 to 5.576   |
| G90 vs C120                    | 35,67      | 43,82  | Yes         | ***     | 31.99 to 39.35    |
| G90 vs G120                    | -8,492     | 10,43  | Yes         | ***     | -12.17 to -4.812  |
| G90 vs GF120                   | 2,027      | 2,490  | No          | ns      | -1.653 to 5.706   |
| G90 vs GR 120                  | 6,037      | 7,417  | Yes         | ***     | 2.357 to 9.716    |
| C120 vs G120                   | -44,16     | 54,26  | Yes         | ***     | -47.84 to -40.48  |
| C120 vs GF120                  | -33,64     | 41,33  | Yes         | ***     | -37.32 to -29.96  |
| C120 vs GR 120                 | -29,63     | 36,41  | Yes         | ***     | -33.31 to -25.95  |
|                                | 10,52      | 12,92  | Yes         | ***     | 6.839 to 14.20    |
| G120 vs GR 120                 | 14,53      | 17,85  | Yes         | ***     | 10.85 to 18.21    |

|                 |       |       |     |   |                 |
|-----------------|-------|-------|-----|---|-----------------|
| GF120 vs GR 120 | 4,010 | 4,927 | Yes | * | 0.3302 to 7.690 |
|-----------------|-------|-------|-----|---|-----------------|



Parameter  
Table Analyzed IL2

#### One-way analysis of variance

P value P<0.0001  
P value summary \*\*\*  
Are means signif. different? ( Yes  
Number of groups 8  
F 240,7  
R squared 0,9768

#### Bartlett's test for equal variances

Bartlett's statistic (corrected) 70,83  
P value P<0.0001  
P value summary \*\*\*  
Do the variances differ signif. Yes

| ANOVA Table                 | SS    | df | MS    |
|-----------------------------|-------|----|-------|
| Treatment (between columns) | 6993  | 7  | 999,0 |
| Residual (within columns)   | 166,0 | 40 | 4,150 |
| Total                       | 7159  | 47 |       |

| Tukey's Multiple Comparison | Mean Diff. | q      | Significant | Summary | 95% CI of diff   |
|-----------------------------|------------|--------|-------------|---------|------------------|
| C90 vs G30                  | -20,34     | 24,46  | Yes         | ***     | -24.10 to -16.58 |
| C90 vs G60                  | -25,29     | 30,41  | Yes         | ***     | -29.05 to -21.53 |
| C90 vs G90                  | -31,31     | 37,64  | Yes         | ***     | -35.07 to -27.55 |
| C90 vs C120                 | 0,1083     | 0,1303 | No          | ns      | -3.652 to 3.868  |
| C90 vs G120                 | -34,19     | 41,11  | Yes         | ***     | -37.95 to -30.43 |
| C90 vs GF120                | -22,13     | 26,60  | Yes         | ***     | -25.89 to -18.37 |
| C90 vs GR 120               | -21,68     | 26,07  | Yes         | ***     | -25.44 to -17.92 |
| G30 vs G60                  | -4,943     | 5,944  | Yes         | **      | -8.703 to -1.183 |
| G30 vs G90                  | -10,96     | 13,18  | Yes         | ***     | -14.72 to -7.202 |
| G30 vs C120                 | 20,45      | 24,59  | Yes         | ***     | 16.69 to 24.21   |
| G30 vs G120                 | -13,84     | 16,65  | Yes         | ***     | -17.60 to -10.08 |
| G30 vs GF120                | -1,782     | 2,142  | No          | ns      | -5.542 to 1.978  |
| G30 vs GR 120               | -1,340     | 1,611  | No          | ns      | -5.100 to 2.420  |
| G60 vs G90                  | -6,018     | 7,236  | Yes         | ***     | -9.778 to -2.258 |
| G60 vs C120                 | 25,40      | 30,54  | Yes         | ***     | 21.64 to 29.16   |
| G60 vs G120                 | -8,900     | 10,70  | Yes         | ***     | -12.66 to -5.140 |
| G60 vs GF120                | 3,162      | 3,802  | No          | ns      | -0.5983 to 6.922 |
| G60 vs GR 120               | 3,603      | 4,333  | No          | ns      | -0.1567 to 7.363 |
| G90 vs C120                 | 31,41      | 37,77  | Yes         | ***     | 27.65 to 35.17   |
| G90 vs G120                 | -2,882     | 3,465  | No          | ns      | -6.642 to 0.8783 |
| G90 vs GF120                | 9,180      | 11,04  | Yes         | ***     | 5.420 to 12.94   |
| G90 vs GR 120               | 9,622      | 11,57  | Yes         | ***     | 5.862 to 13.38   |
| C120 vs G120                | -34,30     | 41,24  | Yes         | ***     | -38.06 to -30.54 |
| C120 vs GF120               | -22,23     | 26,73  | Yes         | ***     | -25.99 to -18.47 |
| C120 vs GR 120              | -21,79     | 26,20  | Yes         | ***     | -25.55 to -18.03 |
| G120 vs GF120               | 12,06      | 14,50  | Yes         | ***     | 8.302 to 15.82   |
| G120 vs GR 120              | 12,50      | 15,03  | Yes         | ***     | 8.743 to 16.26   |

|                 |        |        |    |    |                 |
|-----------------|--------|--------|----|----|-----------------|
| GF120 vs GR 120 | 0,4417 | 0,5311 | No | ns | -3.318 to 4.202 |
|-----------------|--------|--------|----|----|-----------------|

Parameter  
Table Analyzed IL4

#### One-way analysis of variance

P value P<0.0001  
P value summary \*\*\*  
Are means signif. different? (P < Yes  
Number of groups 8  
F 179,7  
R squared 0,9692

#### Bartlett's test for equal variances

Bartlett's statistic (corrected) 66,46  
P value P<0.0001  
P value summary \*\*\*  
Do the variances differ signif. (P Yes

| ANOVA Table                 | SS    | df | MS    |
|-----------------------------|-------|----|-------|
| Treatment (between columns) | 3746  | 7  | 535,1 |
| Residual (within columns)   | 119,1 | 40 | 2,978 |
| Total                       | 3865  | 47 |       |

| Tukey's Multiple Comparison Test | Mean Diff. | q       | Significant | Summary | 95% CI of diff     |
|----------------------------------|------------|---------|-------------|---------|--------------------|
| C90 vs G30                       | -15,80     | 22,43   | Yes         | ***     | -18.99 to -12.62   |
| C90 vs G60                       | -18,79     | 26,67   | Yes         | ***     | -21.98 to -15.61   |
| C90 vs G90                       | -22,95     | 32,58   | Yes         | ***     | -26.14 to -19.77   |
| C90 vs C120                      | -0,01467   | 0,02082 | No          | ns      | -3.200 to 3.171    |
| C90 vs G120                      | -24,07     | 34,16   | Yes         | ***     | -27.25 to -20.88   |
| C90 vs GF120                     | -15,17     | 21,54   | Yes         | ***     | -18.36 to -11.99   |
| C90 vs GR 120                    | -19,04     | 27,03   | Yes         | ***     | -22.23 to -15.86   |
| G30 vs G60                       | -2,992     | 4,246   | No          | ns      | -6.177 to 0.1935   |
| G30 vs G90                       | -7,150     | 10,15   | Yes         | ***     | -10.34 to -3.965   |
| G30 vs C120                      | 15,79      | 22,41   | Yes         | ***     | 12.60 to 18.97     |
| G30 vs G120                      | -8,268     | 11,74   | Yes         | ***     | -11.45 to -5.083   |
| G30 vs GF120                     | 0,6267     | 0,8895  | No          | ns      | -2.559 to 3.812    |
| G30 vs GR 120                    | -3,243     | 4,604   | Yes         | *       | -6.429 to -0.05813 |
| G60 vs G90                       | -4,158     | 5,902   | Yes         | **      | -7.344 to -0.9731  |
| G60 vs C120                      | 18,78      | 26,65   | Yes         | ***     | 15.59 to 21.96     |
| G60 vs G120                      | -5,277     | 7,490   | Yes         | ***     | -8.462 to -2.091   |
| G60 vs GF120                     | 3,618      | 5,136   | Yes         | *       | 0.4331 to 6.804    |
| G60 vs GR 120                    | -0,2517    | 0,3572  | No          | ns      | -3.437 to 2.934    |
| G90 vs C120                      | 22,94      | 32,56   | Yes         | ***     | 19.75 to 26.12     |
| G90 vs G120                      | -1,118     | 1,587   | No          | ns      | -4.304 to 2.067    |
| G90 vs GF120                     | 7,777      | 11,04   | Yes         | ***     | 4.591 to 10.96     |
| G90 vs GR 120                    | 3,907      | 5,545   | Yes         | **      | 0.7215 to 7.092    |
| C120 vs G120                     | -24,06     | 34,14   | Yes         | ***     | -27.24 to -20.87   |
| C120 vs GF120                    | -15,16     | 21,52   | Yes         | ***     | -18.35 to -11.97   |
| C120 vs GR 120                   | -19,03     | 27,01   | Yes         | ***     | -22.22 to -15.84   |
| G120 vs GF120                    | 8,895      | 12,63   | Yes         | ***     | 5.710 to 12.08     |
| G120 vs GR 120                   | 5,025      | 7,132   | Yes         | ***     | 1.840 to 8.210     |

|                 |        |       |     |    |                   |
|-----------------|--------|-------|-----|----|-------------------|
| GF120 vs GR 120 | -3,870 | 5,493 | Yes | ** | -7.055 to -0.6848 |
|-----------------|--------|-------|-----|----|-------------------|

Parameter  
Table Analyzed IL8

#### One-way analysis of variance

P value P<0.0001  
P value summary \*\*\*  
Are means signif. different? (P Yes  
Number of groups 8  
F 181,6  
R squared 0,9695

#### Bartlett's test for equal variances

Bartlett's statistic (corrected) 67,25  
P value P<0.0001  
P value summary \*\*\*  
Do the variances differ signif. ( Yes

| ANOVA Table                 | SS    | df | MS       |
|-----------------------------|-------|----|----------|
| Treatment (between columns) | 5743  |    | 7 820,4  |
| Residual (within columns)   | 180,7 |    | 40 4,518 |
| Total                       | 5924  |    | 47       |

| Tukey's Multiple Comparison T | Mean     | Diff.    | q   | Significant | Summary | 95% CI of diff   |
|-------------------------------|----------|----------|-----|-------------|---------|------------------|
| C90 vs G30                    | -17,26   | 19,89    | Yes | ***         |         | -21.19 to -13.34 |
| C90 vs G60                    | -22,60   | 26,05    | Yes | ***         |         | -26.52 to -18.68 |
| C90 vs G90                    | -28,28   | 32,59    | Yes | ***         |         | -32.21 to -24.36 |
| C90 vs C120                   | 0,004667 | 0,005378 | No  | ns          |         | -3.918 to 3.928  |
| C90 vs G120                   | -30,20   | 34,81    | Yes | ***         |         | -34.13 to -26.28 |
| C90 vs GF120                  | -16,05   | 18,50    | Yes | ***         |         | -19.98 to -12.13 |
| C90 vs GR 120                 | -8,928   | 10,29    | Yes | ***         |         | -12.85 to -5.004 |
| G30 vs G60                    | -5,338   | 6,152    | Yes | **          |         | -9.261 to -1.415 |
| G30 vs G90                    | -11,02   | 12,70    | Yes | ***         |         | -14.94 to -7.097 |
| G30 vs C120                   | 17,27    | 19,90    | Yes | ***         |         | 13.34 to 21.19   |
| G30 vs G120                   | -12,94   | 14,91    | Yes | ***         |         | -16.86 to -9.017 |
| G30 vs GF120                  | 1,208    | 1,392    | No  | ns          |         | -2.715 to 5.131  |
| G30 vs GR 120                 | 8,335    | 9,605    | Yes | ***         |         | 4.412 to 12.26   |
| G60 vs G90                    | -5,682   | 6,548    | Yes | ***         |         | -9.605 to -1.759 |
| G60 vs C120                   | 22,61    | 26,05    | Yes | ***         |         | 18.68 to 26.53   |
| G60 vs G120                   | -7,602   | 8,760    | Yes | ***         |         | -11.52 to -3.679 |
| G60 vs GF120                  | 6,547    | 7,544    | Yes | ***         |         | 2.624 to 10.47   |
| G60 vs GR 120                 | 13,67    | 15,76    | Yes | ***         |         | 9.750 to 17.60   |
| G90 vs C120                   | 28,29    | 32,60    | Yes | ***         |         | 24.36 to 32.21   |
| G90 vs G120                   | -1,920   | 2,213    | No  | ns          |         | -5.843 to 2.003  |
| G90 vs GF120                  | 12,23    | 14,09    | Yes | ***         |         | 8.305 to 16.15   |
| G90 vs GR 120                 | 19,36    | 22,30    | Yes | ***         |         | 15.43 to 23.28   |
| C120 vs G120                  | -30,21   | 34,81    | Yes | ***         |         | -34.13 to -26.28 |
| C120 vs GF120                 | -16,06   | 18,51    | Yes | ***         |         | -19.98 to -12.14 |
| C120 vs GR 120                | -8,932   | 10,29    | Yes | ***         |         | -12.86 to -5.009 |
| G120 vs GF120                 | 14,15    | 16,30    | Yes | ***         |         | 10.23 to 18.07   |
| G120 vs GR 120                | 21,28    | 24,52    | Yes | ***         |         | 17.35 to 25.20   |

|                 |       |       |     |     |                |
|-----------------|-------|-------|-----|-----|----------------|
| GF120 vs GR 120 | 7,127 | 8,213 | Yes | *** | 3.204 to 11.05 |
|-----------------|-------|-------|-----|-----|----------------|

Parameter  
Table Analyzed IL10

#### One-way analysis of variance

P value P<0.0001  
P value summary \*\*\*  
Are means signif. different? Yes  
Number of groups 8  
F 538,2  
R squared 0,9895

#### Bartlett's test for equal variances

Bartlett's statistic (corrected) 38,46  
P value P<0.0001  
P value summary \*\*\*  
Do the variances differ signif Yes

| ANOVA Table               | SS    | df | MS      |
|---------------------------|-------|----|---------|
| Treatment (between column | 4974  |    | 7 710,6 |
| Residual (within columns) | 52,82 | 40 | 1,320   |
| Total                     | 5027  | 47 |         |

| Tukey's Multiple Comparison | Mean Diff. | q      | Significant | Summary | 95% CI of diff   |
|-----------------------------|------------|--------|-------------|---------|------------------|
| C90 vs G30                  | -12,83     | 27,34  | Yes         | ***     | -14.95 to -10.71 |
| C90 vs G60                  | -18,19     | 38,78  | Yes         | ***     | -20.31 to -16.07 |
| C90 vs G90                  | -19,04     | 40,59  | Yes         | ***     | -21.16 to -16.92 |
| C90 vs C120                 | 0,1415     | 0,3016 | No          | ns      | -1.979 to 2.262  |
| C90 vs G120                 | -19,80     | 42,20  | Yes         | ***     | -21.92 to -17.67 |
| C90 vs GF120                | -26,48     | 56,45  | Yes         | ***     | -28.60 to -24.36 |
| C90 vs GR 120               | -28,85     | 61,51  | Yes         | ***     | -30.97 to -26.73 |
| G30 vs G60                  | -5,367     | 11,44  | Yes         | ***     | -7.488 to -3.246 |
| G30 vs G90                  | -6,215     | 13,25  | Yes         | ***     | -8.336 to -4.094 |
| G30 vs C120                 | 12,97      | 27,64  | Yes         | ***     | 10.85 to 15.09   |
| G30 vs G120                 | -6,968     | 14,85  | Yes         | ***     | -9.089 to -4.847 |
| G30 vs GF120                | -13,65     | 29,10  | Yes         | ***     | -15.77 to -11.53 |
| G30 vs GR 120               | -16,03     | 34,16  | Yes         | ***     | -18.15 to -13.91 |
| G60 vs G90                  | -0,8483    | 1,808  | No          | ns      | -2.969 to 1.273  |
| G60 vs C120                 | 18,34      | 39,08  | Yes         | ***     | 16.21 to 20.46   |
| G60 vs G120                 | -1,602     | 3,414  | No          | ns      | -3.723 to 0.5192 |
| G60 vs GF120                | -8,287     | 17,66  | Yes         | ***     | -10.41 to -6.166 |
| G60 vs GR 120               | -10,66     | 22,72  | Yes         | ***     | -12.78 to -8.539 |
| G90 vs C120                 | 19,18      | 40,89  | Yes         | ***     | 17.06 to 21.30   |
| G90 vs G120                 | -0,7533    | 1,606  | No          | ns      | -2.874 to 1.368  |
| G90 vs GF120                | -7,438     | 15,86  | Yes         | ***     | -9.559 to -5.317 |
| G90 vs GR 120               | -9,812     | 20,92  | Yes         | ***     | -11.93 to -7.691 |
| C120 vs G120                | -19,94     | 42,50  | Yes         | ***     | -22.06 to -17.82 |
| C120 vs GF120               | -26,62     | 56,75  | Yes         | ***     | -28.74 to -24.50 |
| C120 vs GR 120              | -29,00     | 61,81  | Yes         | ***     | -31.12 to -26.87 |
| G120 vs GF120               | -6,685     | 14,25  | Yes         | ***     | -8.806 to -4.564 |
| G120 vs GR 120              | -9,058     | 19,31  | Yes         | ***     | -11.18 to -6.937 |

|                 |        |       |     |   |                   |
|-----------------|--------|-------|-----|---|-------------------|
| GF120 vs GR 120 | -2,373 | 5,059 | Yes | * | -4.494 to -0.2524 |
|-----------------|--------|-------|-----|---|-------------------|



Parameter  
Table Analyzed IL18

#### One-way analysis of variance

P value P<0.0001  
P value summary \*\*\*  
Are means signif. different? (P < 0.05) Yes  
Number of groups 8  
F 217,7  
R squared 0,9744

#### Bartlett's test for equal variances

Bartlett's statistic (corrected) 57,12  
P value P<0.0001  
P value summary \*\*\*  
Do the variances differ signif. (P < 0.05) Yes

| ANOVA Table                 | SS    | df | MS       |
|-----------------------------|-------|----|----------|
| Treatment (between columns) | 4398  |    | 7 628,3  |
| Residual (within columns)   | 115,4 |    | 40 2,886 |
| Total                       | 4514  |    | 47       |

| Tukey's Multiple Comparison Test | Mean Diff. | q       | Significant | Summary | 95% CI of diff   |
|----------------------------------|------------|---------|-------------|---------|------------------|
| C90 vs G30                       | -7,216     | 10,40   | Yes         | ***     | -10.35 to -4.080 |
| C90 vs G60                       | -14,60     | 21,05   | Yes         | ***     | -17.73 to -11.46 |
| C90 vs G90                       | -23,90     | 34,46   | Yes         | ***     | -27.03 to -20.76 |
| C90 vs C120                      | 0,02567    | 0,03701 | No          | ns      | -3.110 to 3.161  |
| C90 vs G120                      | -28,36     | 40,89   | Yes         | ***     | -31.49 to -25.22 |
| C90 vs GF120                     | -15,06     | 21,72   | Yes         | ***     | -18.20 to -11.93 |
| C90 vs GR 120                    | -12,99     | 18,73   | Yes         | ***     | -16.12 to -9.854 |
| G30 vs G60                       | -7,380     | 10,64   | Yes         | ***     | -10.52 to -4.245 |
| G30 vs G90                       | -16,68     | 24,05   | Yes         | ***     | -19.82 to -13.55 |
| G30 vs C120                      | 7,242      | 10,44   | Yes         | ***     | 4.106 to 10.38   |
| G30 vs G120                      | -21,14     | 30,48   | Yes         | ***     | -24.28 to -18.00 |
| G30 vs GF120                     | -7,847     | 11,31   | Yes         | ***     | -10.98 to -4.711 |
| G30 vs GR 120                    | -5,773     | 8,325   | Yes         | ***     | -8.909 to -2.638 |
| G60 vs G90                       | -9,302     | 13,41   | Yes         | ***     | -12.44 to -6.166 |
| G60 vs C120                      | 14,62      | 21,08   | Yes         | ***     | 11.49 to 17.76   |
| G60 vs G120                      | -13,76     | 19,84   | Yes         | ***     | -16.90 to -10.62 |
| G60 vs GF120                     | -0,4667    | 0,6729  | No          | ns      | -3.602 to 2.669  |
| G60 vs GR 120                    | 1,607      | 2,317   | No          | ns      | -1.529 to 4.742  |
| G90 vs C120                      | 23,92      | 34,50   | Yes         | ***     | 20.79 to 27.06   |
| G90 vs G120                      | -4,458     | 6,429   | Yes         | **      | -7.594 to -1.323 |
| G90 vs GF120                     | 8,835      | 12,74   | Yes         | ***     | 5.700 to 11.97   |
| G90 vs GR 120                    | 10,91      | 15,73   | Yes         | ***     | 7.773 to 14.04   |
| C120 vs G120                     | -28,38     | 40,92   | Yes         | ***     | -31.52 to -25.25 |
| C120 vs GF120                    | -15,09     | 21,76   | Yes         | ***     | -18.22 to -11.95 |
| C120 vs GR 120                   | -13,01     | 18,77   | Yes         | ***     | -16.15 to -9.879 |
| G120 vs GF120                    | 13,29      | 19,17   | Yes         | ***     | 10.16 to 16.43   |
| G120 vs GR 120                   | 15,37      | 22,16   | Yes         | ***     | 12.23 to 18.50   |

|                 |       |       |    |    |                 |
|-----------------|-------|-------|----|----|-----------------|
| GF120 vs GR 120 | 2,073 | 2,990 | No | ns | -1.062 to 5.209 |
|-----------------|-------|-------|----|----|-----------------|

Parameter  
Table Analyzed a-Klotho

#### One-way analysis of variance

P value P<0.0001  
P value summary \*\*\*  
Are means signif. different Yes  
Number of groups 8  
F 317,5  
R squared 0,9823

#### Bartlett's test for equal variances

Bartlett's statistic (correcte 46,47  
P value P<0.0001  
P value summary \*\*\*  
Do the variances differ sig Yes

| ANOVA Table               | SS    | df | MS      |
|---------------------------|-------|----|---------|
| Treatment (between column | 2964  |    | 7 423,4 |
| Residual (within columns) | 53,34 | 40 | 1,334   |
| Total                     | 3017  | 47 |         |

| Tukey's Multiple Comparis | Mean Diff. | q       | Significant | Summary | 95% CI of diff    |
|---------------------------|------------|---------|-------------|---------|-------------------|
| C90 vs G30                | -3,789     | 8,037   | Yes         | ***     | -5.921 to -1.658  |
| C90 vs G60                | -4,313     | 9,147   | Yes         | ***     | -6.444 to -2.181  |
| C90 vs G90                | -5,673     | 12,03   | Yes         | ***     | -7.804 to -3.541  |
| C90 vs C120               | 0,02950    | 0,06257 | No          | ns      | -2.102 to 2.161   |
| C90 vs G120               | -6,191     | 13,13   | Yes         | ***     | -8.322 to -4.059  |
| C90 vs GF120              | -15,06     | 31,95   | Yes         | ***     | -17.19 to -12.93  |
| C90 vs GR 120             | -24,67     | 52,33   | Yes         | ***     | -26.80 to -22.54  |
| G30 vs G60                | -0,5233    | 1,110   | No          | ns      | -2.655 to 1.608   |
| G30 vs G90                | -1,883     | 3,995   | No          | ns      | -4.015 to 0.2481  |
| G30 vs C120               | 3,819      | 8,100   | Yes         | ***     | 1.687 to 5.950    |
| G30 vs G120               | -2,402     | 5,094   | Yes         | *       | -4.533 to -0.2702 |
| G30 vs GF120              | -11,27     | 23,91   | Yes         | ***     | -13.40 to -9.142  |
| G30 vs GR 120             | -20,88     | 44,29   | Yes         | ***     | -23.01 to -18.75  |
| G60 vs G90                | -1,360     | 2,885   | No          | ns      | -3.491 to 0.7714  |
| G60 vs C120               | 4,342      | 9,210   | Yes         | ***     | 2.211 to 6.473    |
| G60 vs G120               | -1,878     | 3,984   | No          | ns      | -4.010 to 0.2531  |
| G60 vs GF120              | -10,75     | 22,80   | Yes         | ***     | -12.88 to -8.619  |
| G60 vs GR 120             | -20,36     | 43,18   | Yes         | ***     | -22.49 to -18.23  |
| G90 vs C120               | 5,702      | 12,09   | Yes         | ***     | 3.571 to 7.833    |
| G90 vs G120               | -0,5183    | 1,099   | No          | ns      | -2.650 to 1.613   |
| G90 vs GF120              | -9,390     | 19,92   | Yes         | ***     | -11.52 to -7.259  |
| G90 vs GR 120             | -19,00     | 40,30   | Yes         | ***     | -21.13 to -16.87  |
| C120 vs G120              | -6,220     | 13,19   | Yes         | ***     | -8.352 to -4.089  |
| C120 vs GF120             | -15,09     | 32,01   | Yes         | ***     | -17.22 to -12.96  |
| C120 vs GR 120            | -24,70     | 52,39   | Yes         | ***     | -26.83 to -22.57  |
| G120 vs GF120             | -8,872     | 18,82   | Yes         | ***     | -11.00 to -6.740  |
| G120 vs GR 120            | -18,48     | 39,20   | Yes         | ***     | -20.61 to -16.35  |

|                 |        |       |     |     |                  |
|-----------------|--------|-------|-----|-----|------------------|
| GF120 vs GR 120 | -9,608 | 20,38 | Yes | *** | -11.74 to -7.477 |
|-----------------|--------|-------|-----|-----|------------------|

Parameter  
Table Analyzed KLF4

#### One-way analysis of variance

P value P<0.0001  
P value summary \*\*\*  
Are means signif. different? (P < 0. Yes  
Number of groups 8  
F 498,2  
R squared 0,9887

#### Bartlett's test for equal variances

Bartlett's statistic (corrected) 49,95  
P value P<0.0001  
P value summary \*\*\*  
Do the variances differ signif. (P < Yes

| ANOVA Table                 | SS    | df | MS    |
|-----------------------------|-------|----|-------|
| Treatment (between columns) | 7775  | 7  | 1111  |
| Residual (within columns)   | 89,18 | 40 | 2,230 |
| Total                       | 7864  | 47 |       |

| Tukey's Multiple Comparison Test | Mean Diff. | q       | Significant | Summary | 95% CI of diff   |
|----------------------------------|------------|---------|-------------|---------|------------------|
| C90 vs G30                       | -22,96     | 37,67   | Yes         | ***     | -25.72 to -20.21 |
| C90 vs G60                       | -24,75     | 40,61   | Yes         | ***     | -27.51 to -22.00 |
| C90 vs G90                       | -32,36     | 53,09   | Yes         | ***     | -35.12 to -29.61 |
| C90 vs C120                      | 0,03350    | 0,05495 | No          | ns      | -2.722 to 2.789  |
| C90 vs G120                      | -33,78     | 55,42   | Yes         | ***     | -36.54 to -31.03 |
| C90 vs GF120                     | -16,68     | 27,36   | Yes         | ***     | -19.44 to -13.92 |
| C90 vs GR 120                    | -6,831     | 11,21   | Yes         | ***     | -9.587 to -4.075 |
| G30 vs G60                       | -1,790     | 2,936   | No          | ns      | -4.546 to 0.9660 |
| G30 vs G90                       | -9,402     | 15,42   | Yes         | ***     | -12.16 to -6.646 |
| G30 vs C120                      | 23,00      | 37,72   | Yes         | ***     | 20.24 to 25.75   |
| G30 vs G120                      | -10,82     | 17,75   | Yes         | ***     | -13.58 to -8.066 |
| G30 vs GF120                     | 6,282      | 10,30   | Yes         | ***     | 3.526 to 9.038   |
| G30 vs GR 120                    | 16,13      | 26,46   | Yes         | ***     | 13.38 to 18.89   |
| G60 vs G90                       | -7,612     | 12,49   | Yes         | ***     | -10.37 to -4.856 |
| G60 vs C120                      | 24,79      | 40,66   | Yes         | ***     | 22.03 to 27.54   |
| G60 vs G120                      | -9,032     | 14,82   | Yes         | ***     | -11.79 to -6.276 |
| G60 vs GF120                     | 8,072      | 13,24   | Yes         | ***     | 5.316 to 10.83   |
| G60 vs GR 120                    | 17,92      | 29,40   | Yes         | ***     | 15.17 to 20.68   |
| G90 vs C120                      | 32,40      | 53,15   | Yes         | ***     | 29.64 to 35.15   |
| G90 vs G120                      | -1,420     | 2,329   | No          | ns      | -4.176 to 1.336  |
| G90 vs GF120                     | 15,68      | 25,73   | Yes         | ***     | 12.93 to 18.44   |
| G90 vs GR 120                    | 25,53      | 41,89   | Yes         | ***     | 22.78 to 28.29   |
| C120 vs G120                     | -33,82     | 55,48   | Yes         | ***     | -36.57 to -31.06 |
| C120 vs GF120                    | -16,71     | 27,42   | Yes         | ***     | -19.47 to -13.96 |
| C120 vs GR 120                   | -6,864     | 11,26   | Yes         | ***     | -9.620 to -4.108 |
| G120 vs GF120                    | 17,10      | 28,06   | Yes         | ***     | 14.35 to 19.86   |
| G120 vs GR 120                   | 26,95      | 44,22   | Yes         | ***     | 24.20 to 29.71   |

|                 |       |       |     |     |                |
|-----------------|-------|-------|-----|-----|----------------|
| GF120 vs GR 120 | 9,850 | 16,16 | Yes | *** | 7.094 to 12.61 |
|-----------------|-------|-------|-----|-----|----------------|

Parameter  
Table Analyzed HOXA5

#### One-way analysis of variance

P value P<0.0001  
P value summary \*\*\*  
Are means signif. different? ( Yes  
Number of groups 8  
F 386,4  
R squared 0,9854

#### Bartlett's test for equal variances

Bartlett's statistic (corrected) 71,81  
P value P<0.0001  
P value summary \*\*\*  
Do the variances differ signif. Yes

| ANOVA Table                | SS    | df | MS    |
|----------------------------|-------|----|-------|
| Treatment (between columns | 7662  | 7  | 1095  |
| Residual (within columns)  | 113,3 | 40 | 2,833 |
| Total                      | 7775  | 47 |       |

| Tukey's Multiple Comparison | Mean Diff. | q      | Significant | Summary | 95% CI of diff    |
|-----------------------------|------------|--------|-------------|---------|-------------------|
| C90 vs G30                  | -14,01     | 20,39  | Yes         | ***     | -17.12 to -10.90  |
| C90 vs G60                  | -8,600     | 12,52  | Yes         | ***     | -11.71 to -5.493  |
| C90 vs G90                  | -7,996     | 11,64  | Yes         | ***     | -11.10 to -4.890  |
| C90 vs C120                 | 0,1453     | 0,2115 | No          | ns      | -2.961 to 3.252   |
| C90 vs G120                 | -3,706     | 5,393  | Yes         | **      | -6.812 to -0.5995 |
| C90 vs GF120                | -32,34     | 47,07  | Yes         | ***     | -35.45 to -29.23  |
| C90 vs GR 120               | -33,76     | 49,14  | Yes         | ***     | -36.87 to -30.65  |
| G30 vs G60                  | 5,412      | 7,876  | Yes         | ***     | 2.305 to 8.518    |
| G30 vs G90                  | 6,015      | 8,754  | Yes         | ***     | 2.909 to 9.121    |
| G30 vs C120                 | 14,16      | 20,60  | Yes         | ***     | 11.05 to 17.26    |
| G30 vs G120                 | 10,31      | 15,00  | Yes         | ***     | 7.199 to 13.41    |
| G30 vs GF120                | -18,33     | 26,68  | Yes         | ***     | -21.44 to -15.22  |
| G30 vs GR 120               | -19,75     | 28,74  | Yes         | ***     | -22.86 to -16.64  |
| G60 vs G90                  | 0,6033     | 0,8781 | No          | ns      | -2.503 to 3.710   |
| G60 vs C120                 | 8,745      | 12,73  | Yes         | ***     | 5.638 to 11.85    |
| G60 vs G120                 | 4,894      | 7,122  | Yes         | ***     | 1.787 to 8.000    |
| G60 vs GF120                | -23,74     | 34,55  | Yes         | ***     | -26.85 to -20.64  |
| G60 vs GR 120               | -25,16     | 36,62  | Yes         | ***     | -28.27 to -22.06  |
| G90 vs C120                 | 8,142      | 11,85  | Yes         | ***     | 5.035 to 11.25    |
| G90 vs G120                 | 4,290      | 6,244  | Yes         | **      | 1.184 to 7.397    |
| G90 vs GF120                | -24,35     | 35,43  | Yes         | ***     | -27.45 to -21.24  |
| G90 vs GR 120               | -25,77     | 37,50  | Yes         | ***     | -28.87 to -22.66  |
| C120 vs G120                | -3,851     | 5,605  | Yes         | **      | -6.958 to -0.7448 |
| C120 vs GF120               | -32,49     | 47,28  | Yes         | ***     | -35.59 to -29.38  |
| C120 vs GR 120              | -33,91     | 49,35  | Yes         | ***     | -37.01 to -30.80  |
| G120 vs GF120               | -28,64     | 41,68  | Yes         | ***     | -31.74 to -25.53  |
| G120 vs GR 120              | -30,06     | 43,74  | Yes         | ***     | -33.16 to -26.95  |

|                 |        |       |    |    |                 |
|-----------------|--------|-------|----|----|-----------------|
| GF120 vs GR 120 | -1,420 | 2,067 | No | ns | -4.526 to 1.686 |
|-----------------|--------|-------|----|----|-----------------|



Parameter  
Table Analyzed NANOG

#### One-way analysis of variance

P value P<0.0001  
P value summary \*\*\*  
Are means signif. different? Yes  
Number of groups 8  
F 216,4  
R squared 0,9743

#### Bartlett's test for equal variances

Bartlett's statistic (corrected) 52,80  
P value P<0.0001  
P value summary \*\*\*  
Do the variances differ sign Yes

| ANOVA Table               | SS    | df | MS    |
|---------------------------|-------|----|-------|
| Treatment (between column | 5751  | 7  | 821,5 |
| Residual (within columns) | 151,8 | 40 | 3,796 |
| Total                     | 5903  | 47 |       |

| Tukey's Multiple Compariso | Mean Diff. | q       | Significant | Summary | 95% CI of diff   |
|----------------------------|------------|---------|-------------|---------|------------------|
| C90 vs G30                 | -18,05     | 22,69   | Yes         | ***     | -21.64 to -14.45 |
| C90 vs G60                 | -20,17     | 25,36   | Yes         | ***     | -23.77 to -16.57 |
| C90 vs G90                 | -26,56     | 33,40   | Yes         | ***     | -30.16 to -22.97 |
| C90 vs C120                | 0,06517    | 0,08193 | No          | ns      | -3.531 to 3.661  |
| C90 vs G120                | -31,21     | 39,24   | Yes         | ***     | -34.80 to -27.61 |
| C90 vs GF120               | -14,59     | 18,34   | Yes         | ***     | -18.18 to -10.99 |
| C90 vs GR 120              | -6,332     | 7,962   | Yes         | ***     | -9.928 to -2.737 |
| G30 vs G60                 | -2,123     | 2,670   | No          | ns      | -5.719 to 1.472  |
| G30 vs G90                 | -8,515     | 10,71   | Yes         | ***     | -12.11 to -4.919 |
| G30 vs C120                | 18,11      | 22,77   | Yes         | ***     | 14.52 to 21.71   |
| G30 vs G120                | -13,16     | 16,55   | Yes         | ***     | -16.76 to -9.566 |
| G30 vs GF120               | 3,462      | 4,352   | No          | ns      | -0.1341 to 7.057 |
| G30 vs GR 120              | 11,72      | 14,73   | Yes         | ***     | 8.119 to 15.31   |
| G60 vs G90                 | -6,392     | 8,036   | Yes         | ***     | -9.987 to -2.796 |
| G60 vs C120                | 20,24      | 25,44   | Yes         | ***     | 16.64 to 23.83   |
| G60 vs G120                | -11,04     | 13,88   | Yes         | ***     | -14.63 to -7.443 |
| G60 vs GF120               | 5,585      | 7,022   | Yes         | ***     | 1.989 to 9.181   |
| G60 vs GR 120              | 13,84      | 17,40   | Yes         | ***     | 10.24 to 17.43   |
| G90 vs C120                | 26,63      | 33,48   | Yes         | ***     | 23.03 to 30.22   |
| G90 vs G120                | -4,647     | 5,842   | Yes         | **      | -8.242 to -1.051 |
| G90 vs GF120               | 11,98      | 15,06   | Yes         | ***     | 8.381 to 15.57   |
| G90 vs GR 120              | 20,23      | 25,44   | Yes         | ***     | 16.63 to 23.83   |
| C120 vs G120               | -31,27     | 39,32   | Yes         | ***     | -34.87 to -27.68 |
| C120 vs GF120              | -14,65     | 18,42   | Yes         | ***     | -18.25 to -11.06 |
| C120 vs GR 120             | -6,398     | 8,044   | Yes         | ***     | -9.993 to -2.802 |
| G120 vs GF120              | 16,62      | 20,90   | Yes         | ***     | 13.03 to 20.22   |
| G120 vs GR 120             | 24,88      | 31,28   | Yes         | ***     | 21.28 to 28.47   |

|                 |       |       |     |     |                |
|-----------------|-------|-------|-----|-----|----------------|
| GF120 vs GR 120 | 8,253 | 10,38 | Yes | *** | 4.658 to 11.85 |
|-----------------|-------|-------|-----|-----|----------------|

Parameter  
Table Analyzed HIF1a

One-way analysis of variance

P value P<0.0001  
P value summary \*\*\*  
Are means signif. different? ( Yes  
Number of groups 8  
F 554,2  
R squared 0,9898

Bartlett's test for equal variances

Bartlett's statistic (corrected) 46,54  
P value P<0.0001  
P value summary \*\*\*  
Do the variances differ signif. Yes

| ANOVA Table                 | SS    | df | MS    |
|-----------------------------|-------|----|-------|
| Treatment (between columns) | 7226  | 7  | 1032  |
| Residual (within columns)   | 74,51 | 40 | 1,863 |
| Total                       | 7301  | 47 |       |

| Tukey's Multiple Comparison | Mean Diff. | q      | Significant | Summary | 95% CI of diff   |
|-----------------------------|------------|--------|-------------|---------|------------------|
| C90 vs G30                  | -19,93     | 35,77  | Yes         | ***     | -22.45 to -17.41 |
| C90 vs G60                  | -24,65     | 44,25  | Yes         | ***     | -27.17 to -22.14 |
| C90 vs G90                  | -28,45     | 51,05  | Yes         | ***     | -30.96 to -25.93 |
| C90 vs C120                 | 0,0590     | 0,1059 | No          | ns      | -2.460 to 2.578  |
| C90 vs G120                 | -33,02     | 59,26  | Yes         | ***     | -35.54 to -30.50 |
| C90 vs GF120                | -13,50     | 24,23  | Yes         | ***     | -16.02 to -10.98 |
| C90 vs GR 120               | -3,663     | 6,574  | Yes         | ***     | -6.182 to -1.144 |
| G30 vs G60                  | -4,723     | 8,477  | Yes         | ***     | -7.242 to -2.204 |
| G30 vs G90                  | -8,515     | 15,28  | Yes         | ***     | -11.03 to -5.996 |
| G30 vs C120                 | 19,99      | 35,88  | Yes         | ***     | 17.47 to 22.51   |
| G30 vs G120                 | -13,09     | 23,49  | Yes         | ***     | -15.61 to -10.57 |
| G30 vs GF120                | 6,433      | 11,55  | Yes         | ***     | 3.914 to 8.952   |
| G30 vs GR 120               | 16,27      | 29,20  | Yes         | ***     | 13.75 to 18.79   |
| G60 vs G90                  | -3,792     | 6,805  | Yes         | ***     | -6.311 to -1.273 |
| G60 vs C120                 | 24,71      | 44,35  | Yes         | ***     | 22.19 to 27.23   |
| G60 vs G120                 | -8,365     | 15,01  | Yes         | ***     | -10.88 to -5.846 |
| G60 vs GF120                | 11,16      | 20,02  | Yes         | ***     | 8.638 to 13.68   |
| G60 vs GR 120               | 20,99      | 37,68  | Yes         | ***     | 18.47 to 23.51   |
| G90 vs C120                 | 28,51      | 51,16  | Yes         | ***     | 25.99 to 31.02   |
| G90 vs G120                 | -4,573     | 8,208  | Yes         | ***     | -7.092 to -2.054 |
| G90 vs GF120                | 14,95      | 26,83  | Yes         | ***     | 12.43 to 17.47   |
| G90 vs GR 120               | 24,78      | 44,48  | Yes         | ***     | 22.26 to 27.30   |
| C120 vs G120                | -33,08     | 59,37  | Yes         | ***     | -35.60 to -30.56 |
| C120 vs GF120               | -13,56     | 24,33  | Yes         | ***     | -16.08 to -11.04 |
| C120 vs GR 120              | -3,722     | 6,680  | Yes         | ***     | -6.241 to -1.203 |
| G120 vs GF120               | 19,52      | 35,04  | Yes         | ***     | 17.00 to 22.04   |
| G120 vs GR 120              | 29,36      | 52,69  | Yes         | ***     | 26.84 to 31.88   |

|                 |       |       |     |     |                |
|-----------------|-------|-------|-----|-----|----------------|
| GF120 vs GR 120 | 9,835 | 17,65 | Yes | *** | 7.316 to 12.35 |
|-----------------|-------|-------|-----|-----|----------------|
